# Supplementary material
Source: Royal Society of Chemistry journal article supplement (doi:10.1039/d5ay01489a)
Supplement: d5ay01489a1.xlsx [file d5ay01489a1.xlsx]

## Sheet: Figures S1 - S3
	Fig S1. Peak sizes of saccharide adducts [M+Li]+ from lithium chloride.																Fig S2. Peak sizes of saccharide adducts [M+NH4]+ from ammonium chloride.
	Fig S3. Peak sizes of saccharide adducts with regards to [M+35Cl]- from ammonium chloride.

## Sheet: Table S1
	Table S1) Method validation parameters
	Analyte	Standard no.	RT	Mass channel	Repeat RSD	Reproducability	LOD	LOR	MOD	MOR	Linear range	R2
	Units		(min)	(m/z)	(%)	(%)	(µg/L)	(µg/L)	(mg/L)	(mg/L)	(mg/L)
	Monosaccharides:
1	Allose	2	7.95	215	2.26	2.32	50	250	0.5	2.5	2.5 to 50	0.99833
2	Altrose	2	12.69	215	4.17	5.98	50	250	0.5	2.5	2.5 to 50	0.99998
3	Arabinose	1	5.24	185	0.47	1.04	na	na	0.5	2.5	2.5 to 50	0.99987
4	Deoxyribose	4	3.64	169	2.23	3.44	na	na	1	5	5 to 50	0.99998
5	Erythrose	7	8.35	155	5.91	7.12	na	na	1	5	5 to 50	0.99931
6	Fructose	3	8.5	215	1.41	2.25	25	125	0.1	0.5	0.5 to 10	0.99977
7	Fucose	2	3.41	199	1.33	1.89	na	na	1	5	5 to 50	0.99997
8	Galactose	2	6.1	215	1.88	3.97	50	250	0.5	2.5	2.5 to 50	0.99944
9	Glucose	3	6.45	215	1.82	2.43	10	50	0.1	0.5	0.5 to 10	0.99955
10	Gulose	2	7.18	215	2.5	3.22	50	250	0.5	2.5	2.5 to 50	0.99833
11	Idose	9	19.1	215	qual only	qual only	na	na	na	na	qual only	qual only
12	Lyxose	4	6.66	185	1.87	3.89	500	2500	1	5	5 to 25	0.99999
13	Mannose	4	7.053	215	1.9	2.61	25	125	0.1	0.5	0.5 to 10	0.99969
14	Mannoheptulose	4	5.294	245	2.96	5.14	10	50	0.1	0.5	0.5 to 10	0.99978
15	Psciose	4	10.02	215	1.96	4.07	25	125	0.1	0.5	0.5 to 10	0.99993
16	Rhamnose	1	4.84	199	1.2	5.46	na	na	1	5	5 to 75	0.99941
17	Ribose	4	9.03	185	1.82	2.35	na	na	1	5	5 to 25	0.99967
18	Sorbose	1	8.91	215	0.71	1.24	25	250	0.1	0.5	0.5 to 10	0.99965
19	Tagatose	1	6.78	215	0.98	1.12	25	100	0.1	0.5	0.5 to 7.5	0.99931
20	Talose	2	16.39	215	3.47	5.87	50	250	0.5	2.5	2.5 to 50	0.99991
21	Xylose	1	7.28	185	0.71	1.59	500	2500	1	5	5 to 50	0.99977
	Disaccharides:
22	Allolactose	7	11.09	317	2.86	4.2	10	50	0.1	0.5	0.1 to 10	0.99591
23	Arabinobiose	4	54.83	317	0.97	3.32	100	500	0.25	0.75	0.75 to 10	0.99979
24	Cellobiose	2	21.25	377	0.9	1.64	10	50	0.1	0.5	0.1 to 10	0.99989
25	Epicellobiose	7	23	377	2.39	3.91	10	50	0.1	0.5	0.1 to 10	0.99986
26	Galactobiose	7	15.92	377	1.97	2.08	10	50	0.1	0.5	0.5 to 10	0.99947
27	Gentibiose	1	18.48	377	2.76	3.63	10	50	0.1	0.5	0.5 to 10	0.99999
28	Isomaltose	3	11.9	377	2.46	2.74	25	125	0.05	0.1	0.1 to 25	0.99946
29	Kojibiose	2	17.56	377	1.16	1.31	10	50	0.25	1	1 to 75	0.99998
30	Inulobiose	7	39.07	377	2.93	3.48	10	50	0.1	0.5	0.1 to 10	0.99973
31	Lactose	1	12.663	377	4.23	6.18	10	50	0.1	0.5	0.5 to 10	0.99994
32	Lactulose	2	13.71	377	1.01	3.76	10	50	0.1	0.5	0.1 to 10	0.99988
33	Laminarbiose	3	38.69	377	1.61	3.87	50	250	0.1	0.5	0.5 to 25	0.99971
34	Leucrose	2	9.61	377	2.09	3.12	10	50	0.1	0.5	0.1 to 10	0.99927
35	Levanbiose	3	43.553	377	1.66	2.26	100	500	0.1	0.5	0.1 to 10	0.99959
36	Maltose	3	37.23	377	0.71	3.55	10	50	0.1	0.5	0.1 to 10	0.99971
37	Maltulose	4	14.56	377	1.64	2.9	10	50	0.1	0.5	0.1 to 25	0.99955
38	2-Mannobiose	3	15.86	377	3.19	5.84	10	50	0.1	0.5	0.1 to 10	0.99559
39	Melibiose	1	9.61	377	3.37	4.17	10	50	0.1	0.5	0.5 to 10	0.99993
40	Neotrehalose	7	9.43	377	2.37937	3.26	10	50	0.1	0.5	0.5 to 10	0.99669
41	Nigerose	2	31.086	377	1.12	1.28	10	50	0.25	1	1 to 25	0.99995
42	Palatinose	3	23.69	377	1.13	1.94	50	250	0.1	0.75	0.75 to 10	0.99977
43	Rutinose	2	6.85	361	2.93	6.94	10	50	0.1	0.5	0.5 to 25	0.99993
44	Sophorose	3	38.28	377	2.18	4.43	25	125	0.1	0.75	0.75 to 10	0.99859
45	Sucrose	3	7.72	377	2.9	5.28	10	50	0.1	0.75	0.75 to 10	0.99604
46	Trehalose	1	2.62	377	2.29	4.46	10	50	0.1	0.5	0.5 to 10	0.99935
47	Trehalulose	3	18.631	377	3.1	4.42	10	50	0.1	0.5	0.1 to 25	0.99933
48	Turanose	2	24.39	377	0.9	3.96	10	50	0.1	0.5	0.1 to 25	0.9999
49	Xylobiose	1	15.73	317	0.49	1.3	10	50	0.1	0.5	0.5 to 10	0.99924
	Trisaccharides:
50	Cellotriose	5	42.42	539	3.58	5	100	500	0.1	0.5	0.1 to 25	0.999663
51	Erlose	3	31.903	539	2.11	4.42	50	250	0.1	0.5	0.5 to 25	0.99935
52	2-Fucosyllactose	4	15.78	532	2.78	6.31	10	50	0.25	1	1 to 25	0.99989
53	3-Fucosyllactose	8	7.7	532	3.65	4.08	10	50	0.25	1	1 to 25	0.99977
54	Inulotriose	4	60.61	539	3.54	4.22	100	500	0.25	1	1 to 25	0.99885
55	Isomaltotriose	6	11.9	539	3.5	5.35	50	250	0.1	0.5	0.5 to 50	0.99933
56	1-Kestose	1	17.09	539	4.19	5.78	50	250	0.1	0.5	0.5 to 10	0.9935
57	Levantriose	2	42.603	539	1.45	2.98	100	500	0.5	2.5	2.5 to 50	0.99989
58	Maltotriose	2	58.92	539	1.48	1.8	100	500	0.5	2.5	2.5 to 50	0.99981
59	Mannotriose	8	14.753	539	1.86	4.38	100	500	0.5	2.5	2.5 to 50	0.99998
60	Melezitose	1	11.55	539	4.11	6.87	50	250	0.1	0.5	0.1 to 10	0.9962
61	Neokestose	8	40.3	539	2.55	4.08	50	250	0.1	0.5	0.1 to 10	0.99959
62	Panose	4	48.17	539	1.51	2.07	100	500	0.25	1	1 to 25	0.99964
63	Raffinose	3	13.61	539	1.49	3.24	50	250	0.1	0.5	0.5 to 25	0.99959
64	Xylotriose	1	32.85	449	0.57	1.33	50	250	0.1	0.5	0.5 to 10	0.99933
	Tetra:
65	Cellotetraose	4	62.54	701	2.14	3.08	100	500	1	5	5 to 25	0.99984
66	6-glucopyranose maltotriose	4	55.42	701	3.1	4.08	na	na	1	5	5 to 50	0.99917
67	Isomaltotetraose	3	41.06	701	2.17	2.68	na	na	1	5	5 to 75	0.9993
68	Maltotetraose	1	41.06	701	2.17	2.68	na	na	1	5	5 to 50	0.9993
69	Nystose	7	50	701	2.55	3.82	na	na	0.1	0.5	0.5 to 25	0.99934
70	Stachyose	3	15.35	701	2.08	4.11	50	250	0.1	0.5	0.5 to 25	0.99963
71	Xylotetraose	1	44.15	581	1.34	2.05	na	na	1	5	5 to 50	0.9962
	Others:
72	Arabitol	2	2.33	187	3.28	4.47	50	250	0.1	0.5	0.5 to 10	0.99946
73	Erythritol	6	2.4	157	1.71	3.27	100	500	0.25	1	1 to 25	0.99923
74	Glycerol	8	2.29	127	6.87	8.11	na	na	1	5	5 to 50	0.99968
75	Inostiol	7	2.2	215	2.38507	2.9	100	500	0.1	0.5	0.5 to 10	0.99981
76	Isomalt	4	2.886	379	3.4	6.34	10	50	0.1	0.5	0.5 to 10	0.99906
77	Lactitol	1	3.061	379	0.72	1.85	10	50	0.1	0.5	0.5 to 10	0.99969
78	Maltitol	3	2.636	379	2.05	3.05	10	50	0.1	0.5	0.5 to 10	0.99932
79	Mannitol	3	2.63	217	2.01	1.9	10	50	0.1	0.5	0.5 to 10	0.99605
80	Xylitol	6	2.36	187	1.2	1.48	100	500	0.1	0.5	0.5 to 5	0.99909
	Notes				n = 8	2 x 8	LOR at 5 x LOD conc.		na = not detected in µg/L concentrations
	qual = qualitative analysis only
	Repeatability calculated using 8 replicate vials of 10 ppm standard mix prepared and analysed on the same day
	Reproducibilty calculated using 16 replicate vials of 10 ppm, 8 were prepared and analysed one day, the remaining 8 was on another day
	Limit of detection calculated by serial dilution of standard mix until the height of the analyte peak was less than 3 times background noise
	Limit of reported 5 times limit of detection and must be able to be part of the linear calibration curve
	Idose was received as solution

## Sheet: Table S2
	Table S2) Results of honeys analysed by IC-MS
	Analyte	Red Gum honey	Country honey	Reported by Kolayli et al., 2012
	Units	g/100g	g/100g
	Monosaccharides:
1	Allose
2	Altrose
3	Arabinose			Yes
4	Deoxyribose
5	Erythrose
6	Fructose	35.07	32.63	Yes
7	Fucose
8	Galactose
9	Glucose	24.8505	21.6	Yes
10	Gulose
11	Idose
12	Lyxose
13	Mannose
14	Mannoheptulose
15	Psciose
16	Rhamnose
17	Ribose
18	Sorbose
19	Tagatose
20	Talose
21	Xylose
	Disaccharides:
22	Allolactose
23	Arabinobiose
24	Cellobiose
25	Epicellobiose
26	Galactobiose
27	Gentibiose	0.84	0.93	Yes
28	Isomaltose	0.75	1.18	Yes
29	Kojibiose	4.05	9.81	Yes
30	Inulobiose	0.11	0.3
31	Lactose
32	Lactulose
33	Laminarbiose			Yes
34	Leucrose	0.07	D
35	Levanbiose	0.19	0.1783
36	Maltose	1.23	1.47	Yes (between 0.5–3.5)
37	Maltulose	1.26	1.17	Yes
38	2-Mannobiose
39	Melibiose	0.0567706	0.0771367	Yes
40	Neotrehalose	0.14	0.17	Yes
41	Nigerose	0.412	0.51	Yes
42	Palatinose	0.23	0.16	Yes
43	Rutinose
44	Sophorose
45	Sucrose	0.07	0.07	Yes (max 5 g/100g)
46	Trehalose	0.1	D	Yes
47	Trehalulose
48	Turanose	2.93	2.12	Yes
49	Xylobiose
	Trisaccharides:
50	Cellotriose		D
51	Erlose	0.62	0.05	Yes
52	2-Fucosyllactose
53	3-Fucosyllactose
54	Inulotriose
55	Isomaltotriose	D	D	Yes
56	1-Kestose	D	D	Yes
57	Levantriose
58	Maltotriose	0.05	D	Yes
59	Mannotriose
60	Melezitose	D	D	Yes
61	Neokestose	D	D	Yes
62	Panose	0.06	0.06	Yes
63	Raffinose	0.3	0.5	Yes
64	Xylotriose
	Tetra:
65	Cellotetraose
66	6-glucopyranose maltotriose
67	Isomaltotetraose
68	Maltotetraose
69	Nystose	D	D
70	Stachyose	D	D
71	Xylotetraose
	Others:
72	Arabitol
73	Erythritol
74	Glycerol
75	Inostiol	D	D
76	Isomalt
77	Lactitol
78	Maltitol	0.0593367	0.106129
79	Mannitol	D	D
80	Xylitol
	Total sugars quantified	73.4487	72.9854
	blank fields are not detected at levels greater than LOD for Table S1
